# Supplementary material for: Role of Archaeal HerA Protein in the Biology of the Bacterium Thermus thermophilus
Source: PubMed Central journal article supplement (PMC5448004; doi:10.3390/genes8050130), 2017-04-27
Supplement: genes-08-00130-s001.pdf [file genes-08-00130-s001.pdf]

Deinococcus L-LFLDKPNARMVEKEDKVVRAKGLSADRYALLGLPAEPFRDVQLLAPPRAGAAGTAIVP  
Ocep L-FYLDKPNRELNEKERE-----RYRRLGLEPEPFSSVAFFAPPRLA-QGQGHV  
Tsc0 L-LFLDKPNRLRLEEAKE-----EYRRLGLPPTPFQSVRFLAPPKKGEEGI--LP  
JL18 L-FFLDKPNARLTEEARK-----AYARLGLPATPFQSVAFVAPPKKAGY---LP  
HB27 L-FFLDKPNARLTEEARK-----AYARLGLPATPFQSVAFVAPPKKAGY---LP  
HB8 L-FFLDKPNARLTEEARK-----AYARLGLPATPFQSVAFVAPPKKAGY---LP  
SG0.5 L-FFLDKPNARLTEEARK-----AYARLGLPATPFQSVAFVAPPKKAGY---LP  
Sulfolobus Y----ESEIKNLNIEP-----KINPLNLTDEFAT-----LL  
Archaeoglobus VGYTFEDGSEKGNVPA-----GIRPERLEPWEFAS-----LV  
Methanocaldococcus V-----KMRNTHILPA-----KLNPIVPEEHLAK-----LL

Deinococcus QTDQRSEGVTPFVFTIREFCARRMLPYVFSASASLNLGFVIGNIEEKLFRLLAAQQTGKG  
Ocep AASSRAEGVRPYHWSIVDFCQDGLLPFLFTDRGAMSNLGFVLDHVTARLAALARGQ--EG  
Tsc0 DVETRLEGVKAYHWDLVQFAQKGLLPFLFTDKGALTNLGFVLAHVTEKLRRLAEGQ--KG  
JL18 DVDTRLEGVEAYHWDLVQFCQRGLLPFLFADRAAMTNLGFVLAHVTEKLRRLAEGQ--KG  
HB27 DVDTRLEGVEAYHWDLVQFCQRGLLPFLFADRAAMTNLGFVLAHVTEKLRRLAEGQ--KG  
HB8 DVDTRLEGVEAYHWDLVQFCQRGLLPFLFADRAAMTNLGFVLAHVTEKLRRLAEGQ--KG  
SG0.5 DVDTRLEGVEAYHWDLVQFCQRGLLPFLFADRAAMTNLGFVLAHVTEKLRRLAEGQ--KG  
Sulfolobus EI-RENATIQ----YRILRRAFKSFLEETK-----  
Archaeoglobus GVDREKAAVQ----RMHLERIFTTVRHEGKAG-----REFVERVLDIA---  
Methanocaldococcus GIG-ENSSVQ----KSFLVYAALTVKYECKENKKQISGL-EYLKKEEKLVECA---

Deinococcus TGLIVHDWQFEDSETPPENLDFSELGGVNLQTFEQLISYLEYKLLEREAGE----GDPK  
Ocep PELYVDDWPEGPTGEA--GAFDSLGRVKIGSFGQLVDYLEFQLLGAES-EGEAASGNHH  
Tsc0 PHLLVADWPGGELPED--ITFDDLGRVRLKSFADLVRYLEYKLLGPETGEGE--GDRT  
JL18 PHLQVEDWPGGEASEG--MSFDQLGKARLKSFSDLVRYLEYKLLGPETGEGE--GDRG  
HB27 PHLQVEDWPGGEASEG--MSFDQLGKARLKSFSDLVRYLEYKLLGPETGEGE--GDRG  
HB8 PHLQVEDWPGGEASEG--MSFDQLGKARLKSFSDLVRYLEYKLLGPETGEGE--GDRG  
SG0.5 PHLQVEDWPGGEASEG--MSFDQLGKARLKSFSDLVRYLEYKLLGPETGEGE--GDRG  
Sulfolobus ----EKLKNGNVNYNELNFRNLILKKVDEVSKN-----EKRK  
Archaeoglobus ----EEWINIAAGKGEA-EYYDFNGIKRVATLD-----RQDL  
Methanocaldococcus ----DKIANSEDKKRIYIEYD-GTRCRXKTVK-----KDDE

Deinococcus WVLRKQSPGTLRAFTRRLRGVQKYLSPILRGDLTPEQAEGRYPDPLRRGIQLTVVDIHALS  
Ocep WTARQHTGTLQAFVRRRLRAASRSVGHVLRGD----APSNAPDPLGSPAQVNVVDIHNLS  
Tsc0 WVARQARGTLEAFVRRRLRSSVENVAHLVRGD----RKGNDPPLGGEQVHVVDLAKLS  
JL18 WTARQAKGTLEAFVRRRLKASVENVAHLVRGD----RPGNDPPLSGE-QVHVVDLAKLS  
HB27 WTARQAKGTLEAFVRRRLRSSVENVAHLVRGD----RPGSPPDPLSGKAQVHVVDLAKLS  
HB8 WTARQAKGTLEAFVRRRLRSSVENVAHLVRGD----RPGSPPDPLSGKAQVHVVDLAKLS  
SG0.5 WTARQAKGTLEAFVRRRLRSSVENVAHLVRGD----RPGSPPDPLSGKAQVHVVDLAKLS  
Sulfolobus DSKDEVINKIEDFLDRY----SEIIDFTAGDVVDKIKIG-----KVVINLSSLD  
Archaeoglobus NALARIKEVSSFMRRY---EDL--LSQNDMLANIKPS-----YLNVVNLSGFD  
Methanocaldococcus MSINRVIEKLRWFINKN---KNI--LGENEGMFDIKSD-----KINVLPLQKIE

Deinococcus AHAQMFVVGVLVREVFYKE--RVGRQDT-----VFVVLDELNKYAPREGDSPIK  
Ocep PQAQMFVVGALLRRVFAAKE--SGSHRGK-----VFVVLDELNKYAPREGESPIK  
Tsc0 PQQQMFVVGSLSDLFAKKE--RGQYRGR-----VFVVLDELNKYAPRDEESPIK
